# Supplementary material for: Graphene oxide enhanced specificity at aptamer and its application to multiplexed enzymatic activity sensing
Source: Royal Society of Chemistry journal article supplement (doi:10.1039/c5ra25481g), 2016-01-01
Supplement: c5ra25481g1.pdf [file c5ra25481g1.pdf]

## Electronic supplementary information

### Graphene oxide enhanced specificity at aptamer and its application to multiplexed enzymatic activity sensing

Xiaojing Xing,<sup>ab</sup> Xueguo Liu,<sup>c</sup> Ying Zhou,<sup>a</sup> Dangdang Xu,<sup>a</sup> Daiwen Pang<sup>a</sup> and Hongwu Tang<sup>a\*</sup>

<sup>a</sup> Key Laboratory of Analytical Chemistry for Biology and Medicine (Ministry of Education),  
College of Chemistry and Molecular Sciences, Research Center for Nanobiology and  
Nanomedicine (MOE 985 Innovative Platform), Wuhan Institute of Biotechnology, and State Key  
Laboratory of Virology, Wuhan University, Wuhan, 430072, China. E-mail: [hwtang@whu.edu.cn](mailto:hwtang@whu.edu.cn);  
Tel: 86-27-68756759; Fax: 86-27-68754067.

<sup>b</sup> College of Chemistry and Pharmaceutical Engineering, Nanyang Normal University, Nanyang  
473061, China.

<sup>c</sup> Department of Biology and Chemical Engineering, Nanyang Institute of Technology, Nanyang  
473004, China.

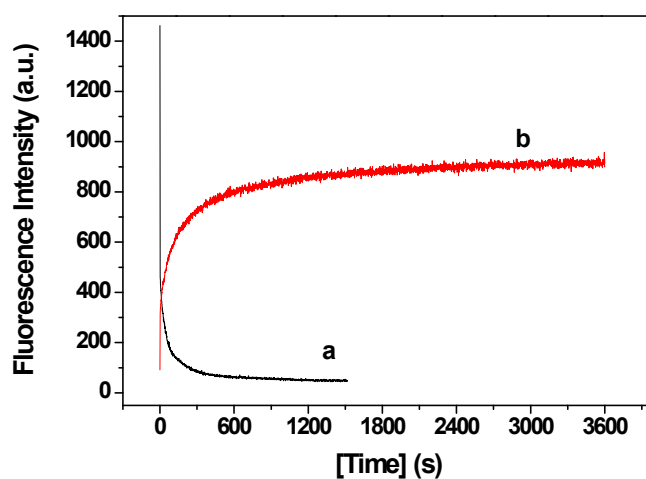

**Fig. S1** The fluorescence intensity of P (40 nM) without (a) and with (b) AD in the presence of 20 µg/mL GO as a function of time.

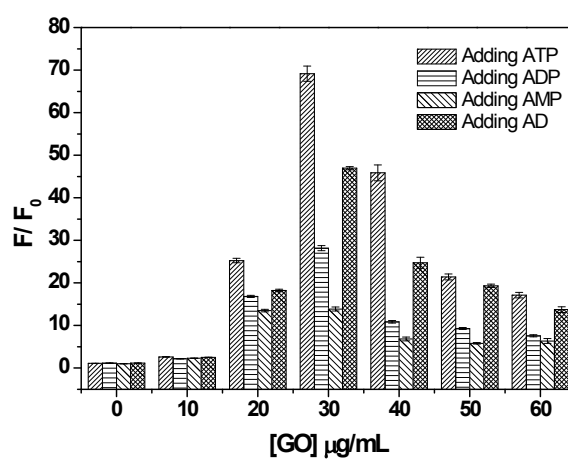

**Fig. S2** Relative fluorescence intensity  $F/F_0$  versus concentration of GO.  $F_0$  and  $F$  are the fluorescence intensity at 520 nm without and with ATP or its analogues.  $[P] = 40$  nM;  $[ATP] = [ADP] = [AMP] = [AD] = 500$  µM.

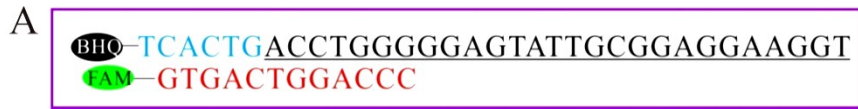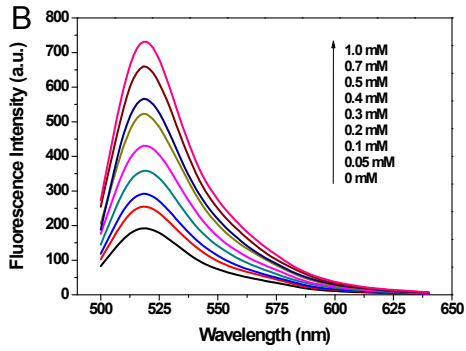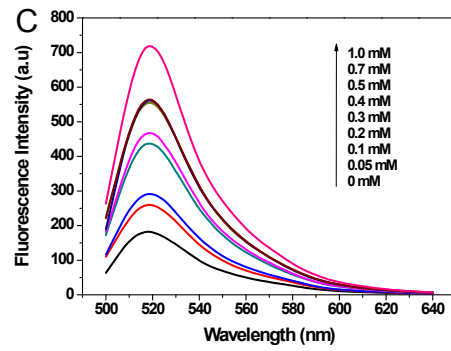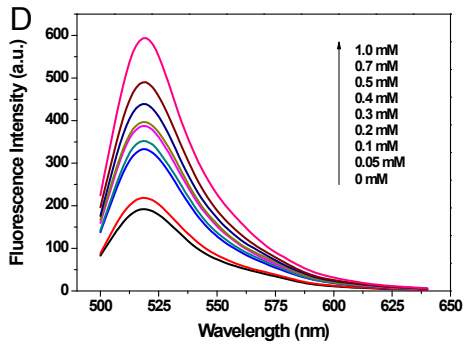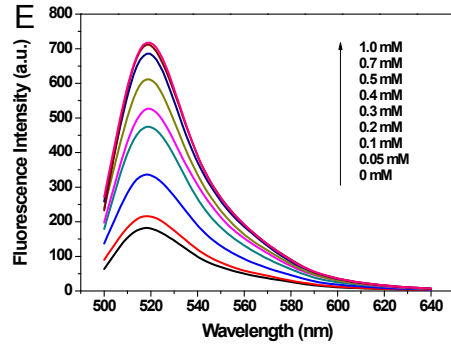

**Fig. S3** (A) Strategy based on structure-switching for ATP detection. (B-E) Fluorescence spectra of the detection system in the presence of different concentrations of ATP, ADP, AMP and AD, respectively.

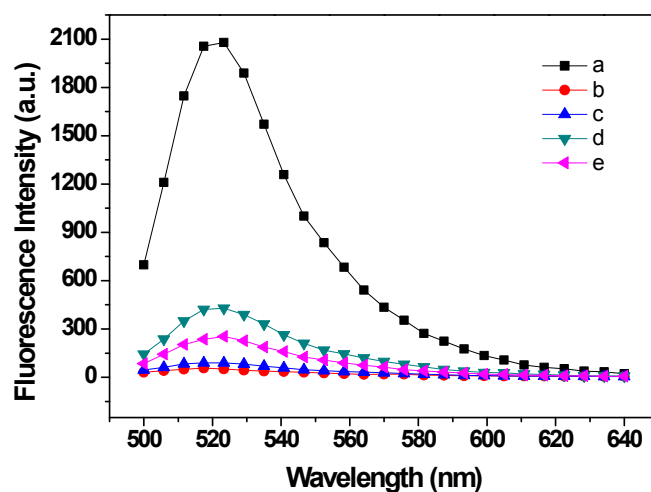

**Fig. S4.** Fluorescence spectra of the assay system under different conditions: (a) P; (b) P + GO; (c) P + GO +AMP; (d) P + GO + AD; (e) P + GO + AMP + ALP. [P] = 40 nM, [GO] = 40  $\mu\text{g/mL}$ , [AMP] = [AD] =500  $\mu\text{M}$ , [ALP] = 45 U/L.

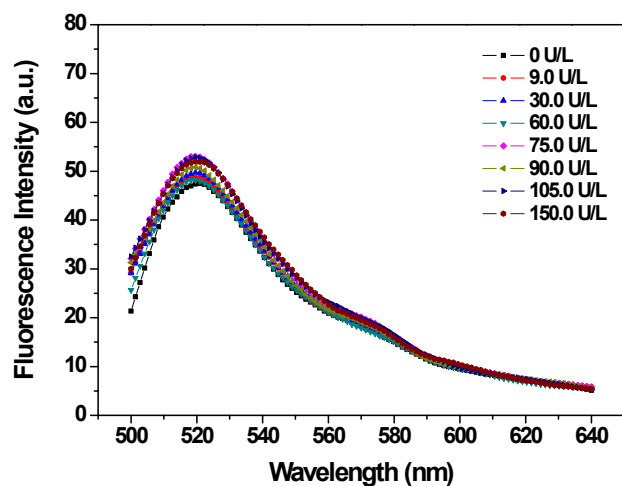

**Fig. S5** The relatively fluorescence intensity of P/GO complex after incubation with different concentrations of inactive ALP ( $F_0$  and  $F$  are the fluorescence intensities in the absence and presence of ALP, respectively). [P] = 40 nM, [GO] = 40  $\mu\text{g/mL}$ , [AMP] = 500  $\mu\text{M}$ .

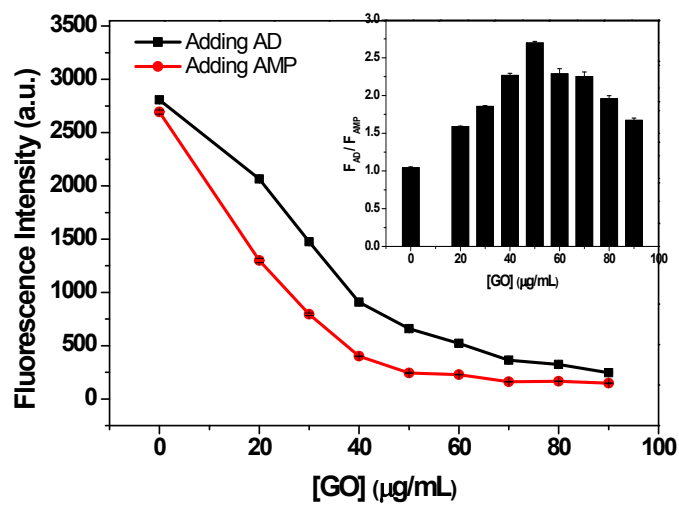

**Fig. S6** Effect of GO concentration on the fluorescence intensity of P in 2 % human serum with AMP or AD. Inset: Relative fluorescence intensity under different concentrations of GO in 2 % human serum (where  $F_{AD}$  and  $F_{AMP}$  are the fluorescence intensity of the detection system in the presence of AD or AMP).

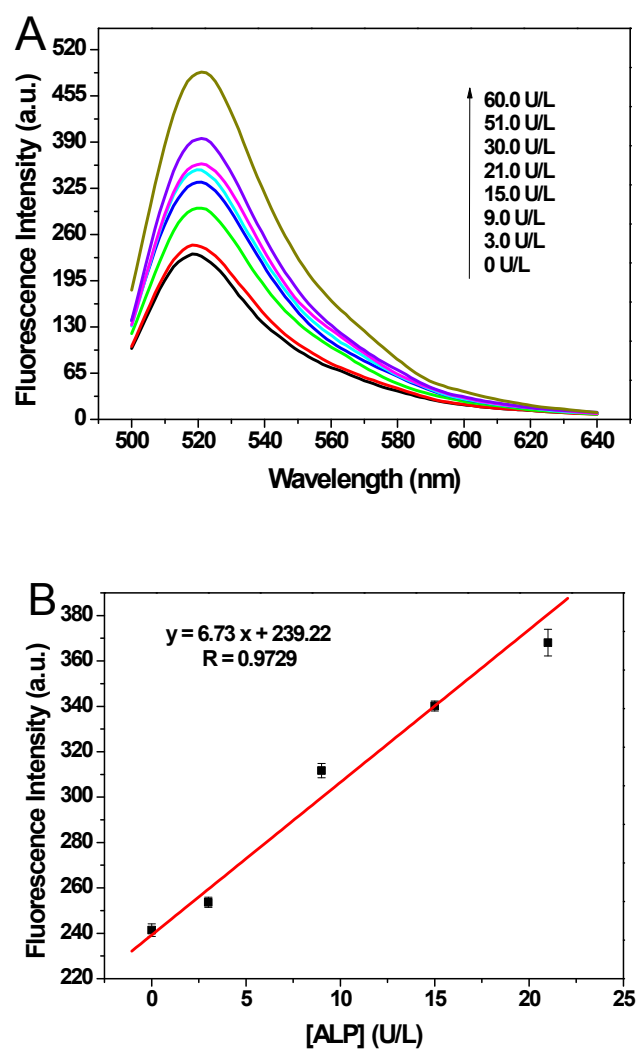

**Fig. S7** (A) Fluorescence spectra of P/GO complex in the presence of different concentrations of ALP in 2 % human serum. (B) Linear relationship between the fluorescence intensity and ALP concentrations in 2 % human serum.
